# Supplementary material for: Rational design of nitrogen-doped porous carbon support on single atom catalysts for efficient CO 2 electroreduction
Source: Royal Society of Chemistry journal article supplement (doi:10.1039/d4ta08536a), 2024-12-17
Supplement: d4ta08536a1.pdf [file d4ta08536a1.pdf]

1 **Supporting information**

2

3 **Rational design of nitrogen-doped porous carbon support on single**  
4 **atom catalysts for efficient CO<sub>2</sub> electroreduction**

5 *Yejung Choi<sup>a,b,†</sup>, Keon-Woo Kim<sup>a,b,†</sup>, Byoung Joon Park<sup>c</sup>, Tae Yong Kim<sup>c</sup>, Yechan Lee<sup>b</sup>, Bomi*  
6 *Park<sup>a,b</sup>, Jin Kon Kim<sup>a,b,\*</sup>, Jeong Woo Han<sup>c,\*</sup>*

7

8 <sup>a</sup>National Creative Research Initiative Center for Hybrid Nano Materials by High-level  
9 Architectural Design of Block Copolymer

10 <sup>b</sup>Department of Chemical Engineering, Pohang University of Science and Technology  
11 (POSTECH), Pohang, Gyeongbuk 37673, Republic of Korea

12 <sup>c</sup>Department of Materials Science and Engineering, Research Institute of Advanced Materials,  
13 Seoul National University, Seoul 08826, Republic of Korea

14

15 †These authors contributed equally to this work

16

17

18

19

20

21

22 \*Corresponding authors' e-mail: jkkim@postech.ac.kr (J.K.K) and jwhan98@snu.ac.kr (J.W.H)

23

## 1 **Experimental section**

### 2 **Chemical reagents**

3 All chemicals were purchased from Sigma-Aldrich, except two PS-*b*-P2VPs (PS(18k)-*b*-  
4 P2VP(9k) with a number-average molecular weight ( $M_n$ ) of PS = 18,000 g mol<sup>-1</sup>, and  $M_n$  of  
5 P2VP = 9,000 g mol<sup>-1</sup>, and the dispersity index ( $D$ ) = (1.08); and PS(40k)-*b*-P2VP(9k) with  $M_n$   
6 of PS = 40,000 g mol<sup>-1</sup>,  $M_n$  of P2VP = 9,000 g mol<sup>-1</sup>, and  $D$  = 1.02), which were purchased from  
7 Polymer Source Inc. All the chemicals were used without further purification. Carbon paper  
8 (Sigracet 22 BB) was supplied by Fuel Cell Store, Germany. Graphene without mesopores (G)  
9 and mesoporous graphitic carbon (mG) with pore sizes of 10 ± 1 nm were purchased from  
10 Sigma-Aldrich and used without further purification.

11

### 12 **Fabrication of the N-mG support**

13 The N-mG support was prepared via the self-assembly of PS-*b*-P2VP and nickel nitrate  
14 hexahydrate (Ni(NO<sub>3</sub>)<sub>2</sub>·6H<sub>2</sub>O). PS-*b*-P2VP (50 mg) was dissolved in tetrahydrofuran (8 ml),  
15 whereas Ni(NO<sub>3</sub>)<sub>2</sub>·6H<sub>2</sub>O (100 mg) and citric acid (32 mg) were dissolved in ethanol (2 ml).  
16 Citric acid was used to retard the hydrolysis and condensation of Ni(NO<sub>3</sub>)<sub>2</sub>·6H<sub>2</sub>O. The two  
17 resulting solutions were mixed and stirred for 30 min and poured into a petri dish and kept for  
18 two days to obtain a mesostructured composite via the evaporation of the solvents. The  
19 mesostructured composite was then placed in an oven at 100 °C for one day to completely  
20 remove the solvents. Next, the mesostructured composite was catalytically pyrolyzed in a tube  
21 furnace using a temperature range of 800–1000 °C for 1 h under a ramping rate of 1 °C min<sup>-1</sup>  
22 and Ar flow (150 sccm). Finally, Ni was removed using 2 M HCl and 2 M HNO<sub>3</sub> under reflux  
23 for 48 h to obtain the N-mG supports.

24

## 1 **Preparation of NiPc/N-mG, NiPc/G, and NiPc/mG**

2 Single-Ni-atom catalysts were prepared using three supports, namely, N-mG, G, and mG.  
3 First, 4 mg of NiPc was added to an ethanol solution (40 ml) containing each support (40 mg).  
4 The solution was sonicated for 1 h and subsequently stirred for 24 h at 40 °C. The powders  
5 were then obtained after washing three times with ethanol in a centrifuge. The powders were  
6 dried and subsequently, thermally treated in a tube furnace at 400 °C for 1 h under Ar flow (150  
7 sccm) to obtain NiPc/N-mG, NiPc/G, and NiPc/mG.

8

## 9 **Materials characterization**

10 The thermal behavior of NiPc was analyzed by thermogravimetric analysis (TGA) (SDT Q600,  
11 TA instruments, USA). The morphologies of the samples were characterized using a field-  
12 emission scanning electron microscope (FE-SEM) (S-4800, Hitachi, Japan) and a high-  
13 resolution transmission electron microscope (HR-TEM) (JEM-2200FS, JEOL Ltd., Japan)  
14 equipped with an image spherical aberration corrector. High-angle annular dark-field scanning  
15 transmission electron microscope (HAADF-STEM) images were acquired using a STEM  
16 (ARM 200F, JEOL Ltd., Japan) at the Materials Imaging & Analysis Center in POSTECH,  
17 South Korea. The surface areas of the samples were determined via Brunauer–Emmett–Teller  
18 (BET) (BELSORP-mini II, Microtrac BEL, Japan) N<sub>2</sub> adsorption measurements. The defect  
19 (D) and graphitic (G) characteristics of the supports were examined using a Raman  
20 spectrometer (Ram II-Senterra, Bruker). The crystal structures were analyzed via X-ray  
21 diffraction (XRD) (D/MAX-2500/PC, Rigaku, Japan), and the chemical states were  
22 characterized using an X-ray photoelectron spectroscope (XPS) (Vg Escalab 250, Thermo  
23 Fisher Scientific, USA) equipped with a monochromatic Al-K $\alpha$  radiation source ( $h\nu = 1486.9$   
24 eV). The nickel content was analyzed by inductively coupled plasma-atomic emission  
25 spectroscopy (ICP-AES) (Spectro ARCOS EOP, Spectro, Germany). The Ni K-edge X-ray  
26 absorption fine structure (XAFS) data were acquired in the fluorescence mode at the 8C nano-

1 probe XAFS beamline (BL8C) at Pohang Light Source using the 3.0 GeV storage ring, with a  
2 ring current of 250 mA. The X-ray beam was monochromated by a Si(111) double crystal,  
3 reducing the beam intensity by 30% to eliminate the higher-order harmonics. The X-ray beam  
4 was subsequently delivered to a secondary source aperture through which the beam size was  
5 adjusted to 0.5 mm (v)  $\times$  1 mm (h). The extended XAFS (EXAFS)  $k^3$ -weighted data were  
6 obtained over the 1.0–13.0  $\text{\AA}^{-1}$  range by applying a Hanning window function.

7

## 8 **Computational details**

9 The Vienna ab initio simulation package (VASP) and projected augmented wave potentials  
10 were used to perform spin-polarized DFT calculations <sup>1,2</sup>. We considered electronic exchange  
11 and correlation by using the revised Perdew-Burke-Ernzerhof functional, employing the  
12 generalized gradient approximation <sup>3</sup>. All computations were performed on a plane-wave basis  
13 with a cutoff of 500 eV. Using the simulation model, the total energy was calculated using  
14 Gaussian smearing with a width of 0.1 eV. The convergence threshold used for the total energy  
15 calculations was set between 5–10 eV. Additionally, all geometric optimizations were  
16 conducted using the conjugate gradient method that considered all forces acting on each atom  
17 and stopped on converging to 0.05 eV/ $\text{\AA}$  for electronic relaxation. The Brillouin zone was  
18 sampled using a k-point on a  $4 \times 4 \times 1$  Monkhorst-Pack grid <sup>4</sup>. The NiPc structure was modeled  
19 by embedding a NiPc molecule ( $\text{Ni-C}_{32}\text{N}_8\text{H}_{16}$ ) onto a graphene supercell ( $17.32 \text{\AA} \times 17.20 \text{\AA}$ ,  
20 112 carbon atoms) with periodic boundary conditions. The Ni metal surface was modeled using  
21 a  $3 \times 3 \times 3$  slab, with the bottom two layers fixed. The vacuum space in the z-direction was  
22 adjusted to 20  $\text{\AA}$  to avoid virtual interactions between the periodic graphene layers. The  
23 computational hydrogen electrode model developed by Nørskov et al. was applied to obtain the  
24 Gibbs free energy changes ( $\Delta G$ ) of the electrochemical steps involved in the  $\text{CO}_2\text{RR}$  <sup>5,6</sup>.  $\Delta G$   
25 was calculated as:

$$26 \quad \Delta G = \Delta E + \Delta \text{ZPE} - T\Delta S - \Delta \text{GU}$$

1 where  $\Delta E$  is the reaction energy,  $\Delta ZPE$  is the difference in the zero-point energy between the  
 2 reactants and the products,  $T\Delta S$  is the contribution of the entropic energy at room temperature  
 3 ( $T = 298.15$  K), and  $\Delta GU = -eU$  is the effect of the applied electrode potential  $U$  on the free  
 4 energy of the electron transfer steps ( $e = 1.602 \times 10^{-9}$  C is the elementary charge). The implicit  
 5 solvent environment was modeled using the VASPsol code, and the relative permittivity was  
 6 set to 80<sup>7, 8</sup>. The limiting potential ( $U_L$ ) of the CO<sub>2</sub>RR and HER were obtained using the  
 7 following equations:

$$8 \quad U_L(\text{CO}_2\text{RR}) = -\frac{\max(\Delta G_{*COOH}, \Delta G_{*CO} - \Delta G_{*COOH}, \Delta G_{CO(g)} - \Delta G_{*CO})}{e}$$

$$9 \quad U_L(\text{HER}) = -\frac{\max(\Delta G_{*H}, \Delta G_{H_2(g)} - \Delta G_{*H})}{e}$$

10

## 11 **Electrochemical measurements**

12 The electrochemical measurements were obtained using a PGSTAT302N-type  
 13 potentiostat/galvanostat in a three-electrode H-type cell separated by a Nafion 117 membrane.  
 14 The working electrode was prepared as follows. Catalyst ink was prepared by dispersing the  
 15 catalyst (2 mg) in a mixture containing 720  $\mu\text{l}$  of ethanol and 80  $\mu\text{l}$  of Nafion solution. After  
 16 sonication for 1 h, the resulting ink (200  $\mu\text{l}$ ) was loaded onto carbon paper (1 cm  $\times$  1 cm) and  
 17 dried to obtain a catalyst loading amount of 0.5 mg cm<sup>-2</sup>. The resulting carbon paper was used  
 18 as the working electrode, whereas Ag/AgCl and a Pt plate were used as the reference and  
 19 counter electrodes, respectively. CO<sub>2</sub> was purged with a constant flow rate of 20 sccm to prepare  
 20 a CO<sub>2</sub>-saturated 0.1 M KHCO<sub>3</sub> electrolyte for all the measurements. Linear sweep voltammetry  
 21 (LSV) was conducted with a scan rate of 5 mV s<sup>-1</sup> in the potential range of 0 to  $-1.2 V_{\text{RHE}}$ .  
 22 Chronoamperometry tests were conducted for 1800 s at each potential. Electrochemically active  
 23 surface area (ECSA) was measured by collecting cycle voltammetry (CV) curves in a potential  
 24 range of 0.3–0  $V_{\text{RHE}}$  with scan rates of 20, 25, 30, 40, and 50 mV s<sup>-1</sup>. Electrochemical impedance  
 25 spectroscopy (EIS) was conducted in a frequency range of 100 kHz to 0.1 Hz at the open circuit

1 potential. The gaseous products obtained during the reaction were monitored via online gas  
2 chromatography (GC, Younglin 6500, Korea) equipped with a thermal conductivity detector  
3 for H<sub>2</sub> quantification and a flame ionization detector for CO quantification. The liquid products  
4 were detected via nuclear magnetic resonance (NMR, Avance III 600, Bruker).

5

## 6 **Faradaic efficiency calculation**

7 The Faradaic efficiencies (FEs) of the gaseous products were calculated as follows:

$$8 \quad FE = \frac{v_{CO_2} \times c \times z \times F}{A \times V_m \times J_{total}} \times 100 \%$$

9 where  $v_{CO_2}$  is the flow rate of CO<sub>2</sub> (20 ml min<sup>-1</sup>),  $c$  is the concentration of the gaseous products  
10 detected by online GC (ppm),  $z$  is the number of transferred electrons ( $z = 2$  for CO and H<sub>2</sub>),  $F$   
11 is the Faradaic constant (96485 C mol<sup>-1</sup>),  $A$  is the geometric area of the working electrode (1  
12 cm<sup>2</sup>),  $V_m$  is the molar volume of gas at 25 °C (24.465 l mol<sup>-1</sup>), and  $J_{total}$  is the total current  
13 density (mA cm<sup>-2</sup>).

14

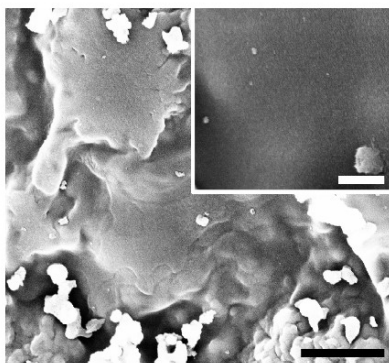

1  
2

3 **Fig. S1.** FE-SEM images after pyrolysis at 900 °C of PS-*b*-P2VP without nickel nitrate (scale  
4 bar: 1 μm, inset: 200 nm). Mesostructures are not observed due to the structural collapse caused  
5 by the uncontrolled carbonization of PS-*b*-P2VP.

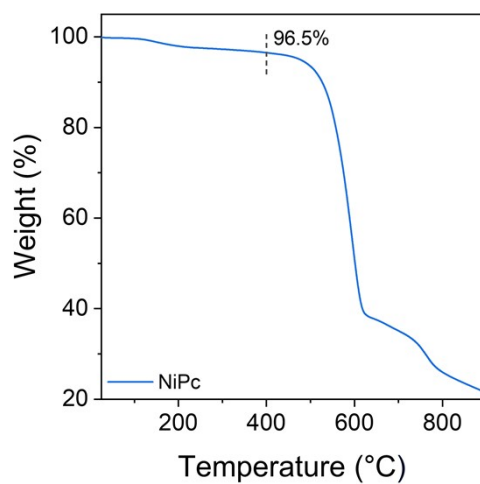

1  
2 **Fig. S2.** TGA thermogram of NiPc at a heating rate of  $5\text{ }^{\circ}\text{C min}^{-1}$  under an argon atmosphere.  
3 At  $400\text{ }^{\circ}\text{C}$ , only a slight weight loss of 3.5% was observed due to residual water evaporation.  
4



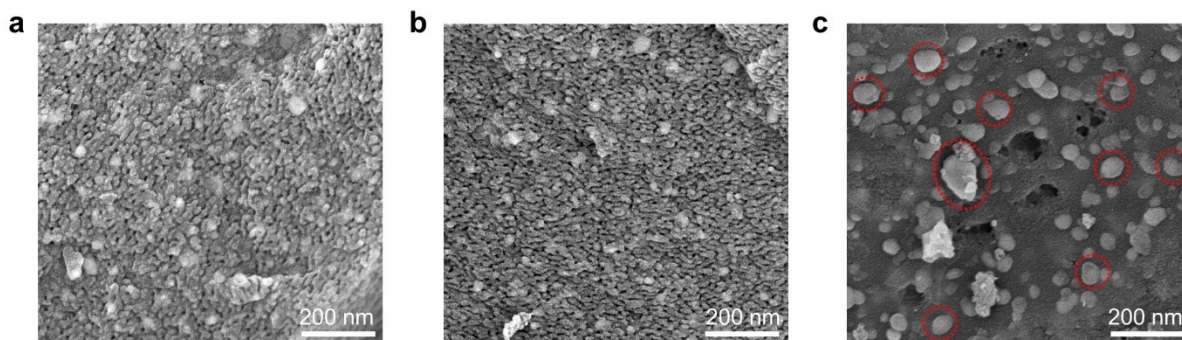

1

2 **Fig. S3.** FE-SEM images of the N-mG supports without Ni etching treatments after catalytic  
3 pyrolysis at various temperatures: (a) 800 °C, (b) 900 °C, and (c) 1000 °C. After catalytic  
4 pyrolysis at temperatures of 800 °C and 900 °C, a well-established mesoporous structure was  
5 obtained; however, at 1000 °C, the thermal expansion of Ni caused structural collapse. The red  
6 circle in Fig. S3c indicates the Ni particles agglomerated owing to thermal expansion.

7

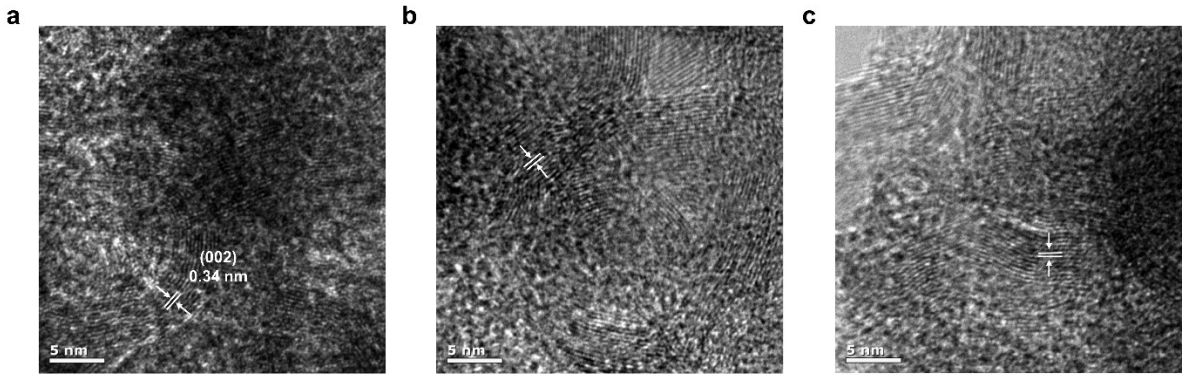

1

2 **Fig. S4.** HR-TEM images of (a) N-mG(800), (b) N-mG(900), and (c) N-mG(1000), showing  
3 that all the N-mG supports possess a graphitic carbon layer with a d-spacing of 0.34 nm, which  
4 is good agreement with that of graphene sheets.

5

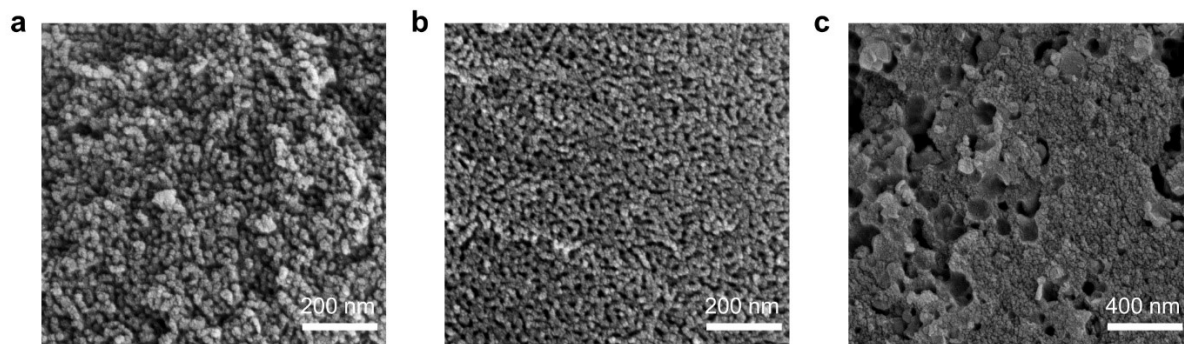

1

2 **Fig. S5.** FE-SEM images of (a) NiPc/N-mG(800), (b) NiPc/N-mG(900), and (c) NiPc/N-  
3 mG(1000).

4

5

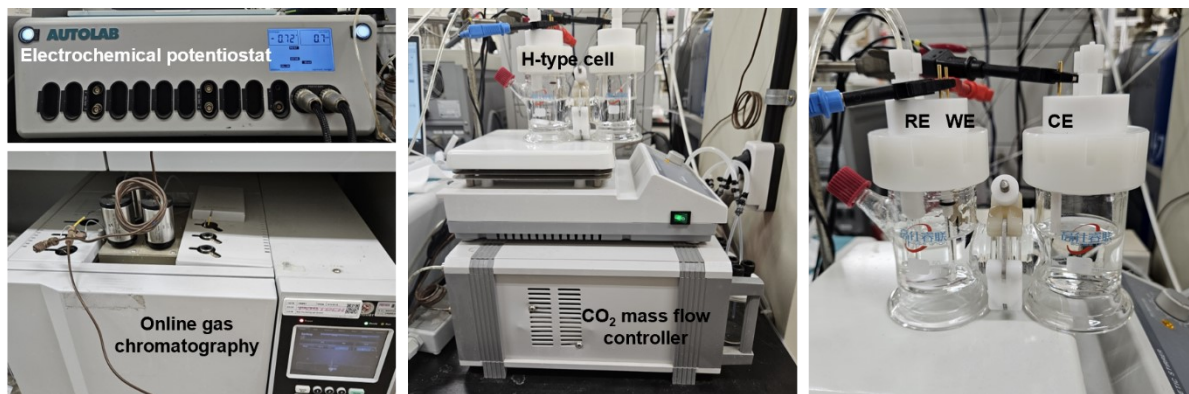

1

2 **Fig. S6.** Photographs of the equipment used for the electrochemical CO<sub>2</sub>RR tests.

3

4

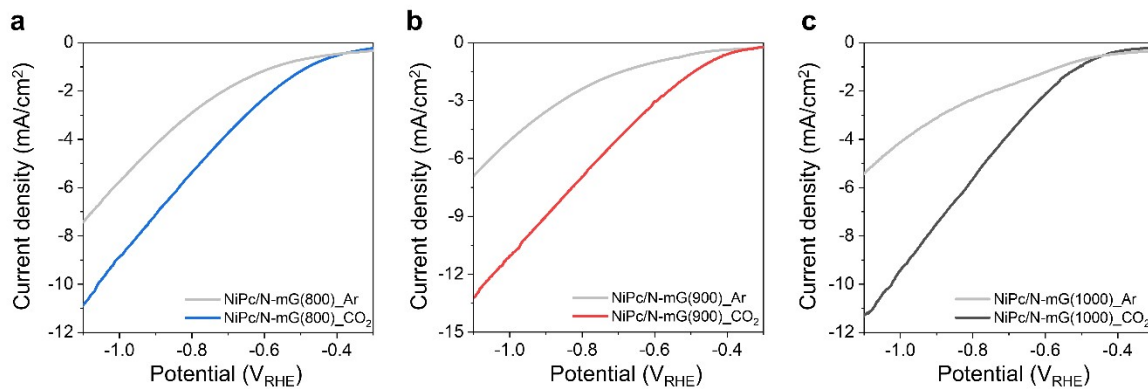

1

2 **Fig. S7.** LSV curves of (a) NiPc/N-mG(800), (b) NiPc/N-mG(900), and (c) NiPc/N-mG(1000)  
 3 in Ar- and CO<sub>2</sub>-saturated 0.1 M KHCO<sub>3</sub> electrolytes.

4

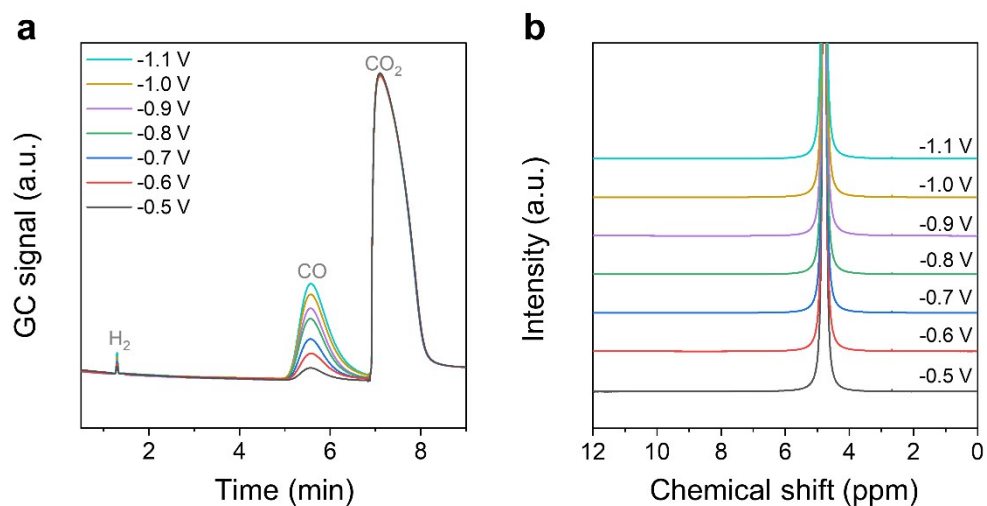

1

2 **Fig. S8.** (a) GC signals for gas products and (b) <sup>1</sup>H-NMR spectra of the electrolyte after the  
 3 CO<sub>2</sub>RR electrolysis of NiPc/N-mG(900) for 1800 s at various potentials. The peak at 4.8 ppm  
 4 in Fig. S8b corresponds to H<sub>2</sub>O, which confirms that no liquid product is formed during the  
 5 CO<sub>2</sub>RR.

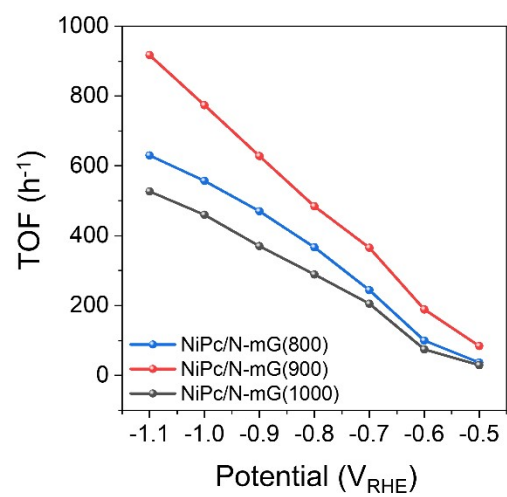

1  
2  
3

**Fig. S9.** Turnover frequencies of NiPc/N-mG catalysts.

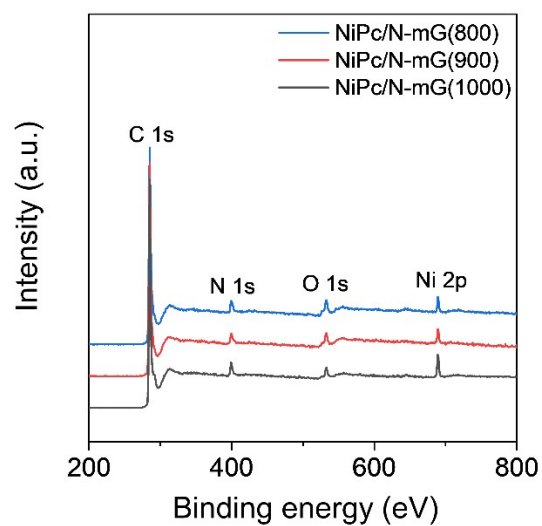

1

2 **Fig. S10.** XPS survey spectra of NiPc/N-mG catalysts. The amount of Ni was 0.65, 0.58,  
3 and 0.89 for NiPc/N-mG(800), NiPc/N-mG(900), and NiPc/N-mG(1000), respectively.

4



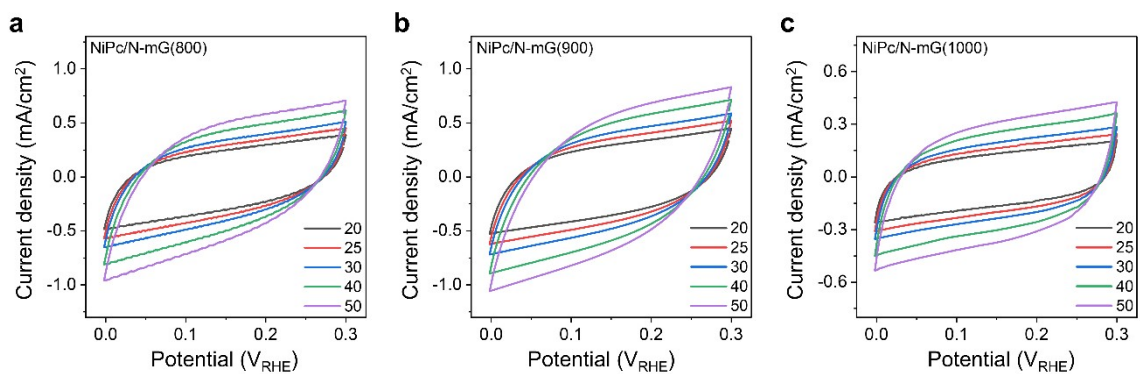

1

2 **Fig. S11.** CV curves of (a) NiPc/N-mG(800), (b) NiPc/N-mG(900), and (c) NiPc/N-mG(1000)  
 3 at various scan rates (20, 25, 30, 40, and 50  $\text{mV s}^{-1}$ ).

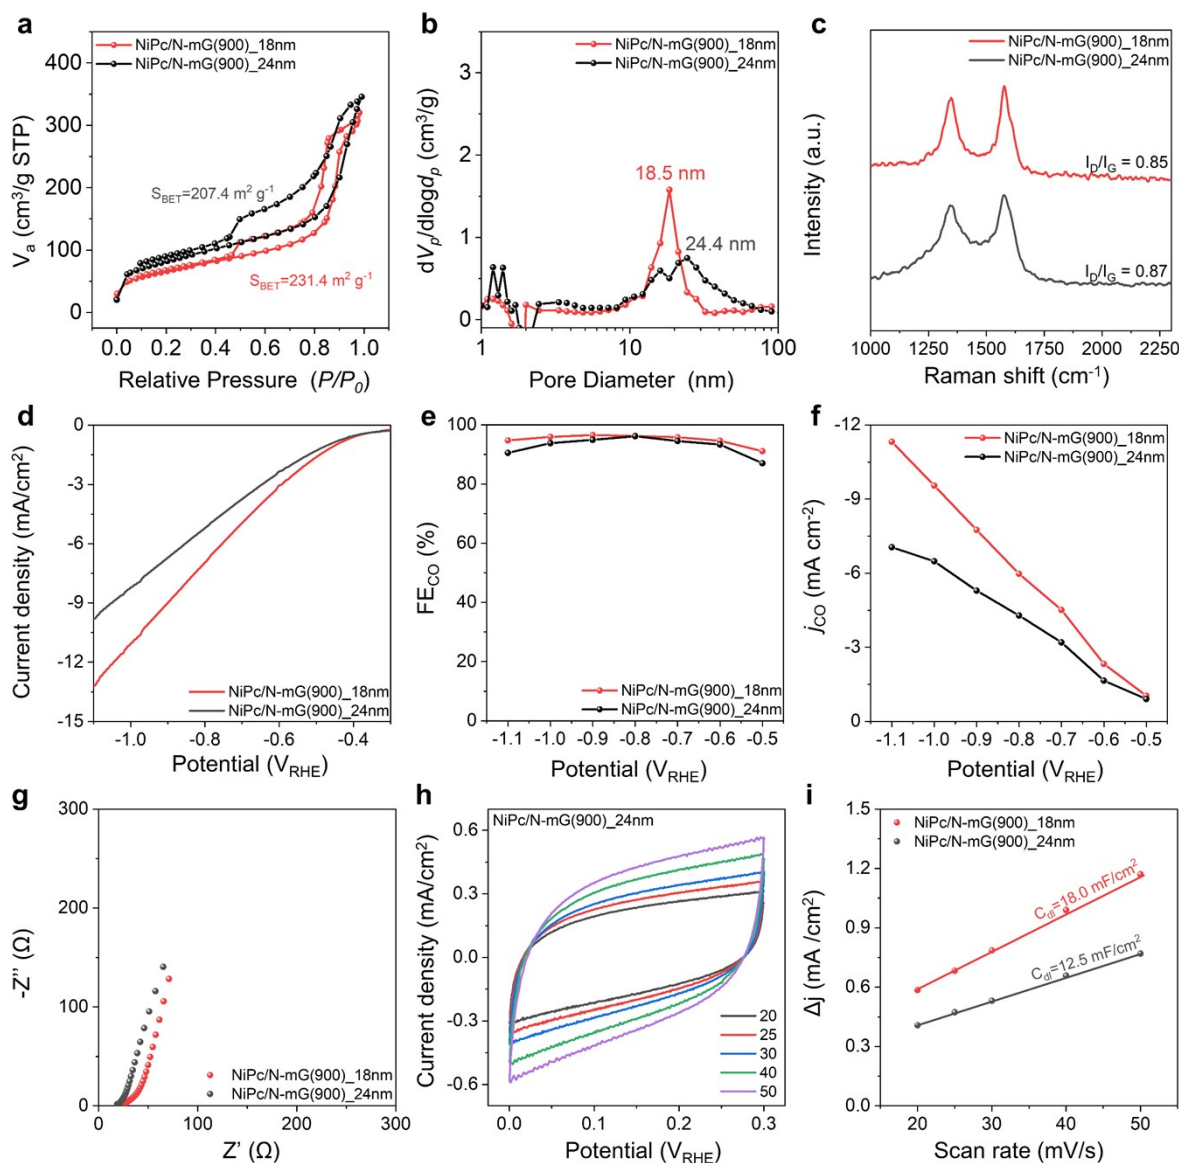

1  
2 **Fig. S12.** Comparisons of NiPc/N-mG(900) catalysts with two different pore sizes (18 and 24  
3 nm): (a) Nitrogen adsorption-desorption isotherms, (b) Pore size distributions, (c) Raman  
4 spectra, (d) LSV curves, (e)  $FE_{CO}$ , and (f)  $j_{CO}$ . (g) CV curves of NiPc/N-mG(900)\_24nm. (h)  
5 Double-layer capacitance, and (i) Nyquist plots.

6

7 The porosity of N-mG(900) supports was also controlled by adjusting the volume fraction of  
8 PS-*b*-P2VP templates. The PS(40k)-*b*-P2VP(9k) template, with larger PS volume fraction than  
9 PS(18k)-*b*-P2VP(9k), resulted in N-mG(900) supports having larger pores of 24 nm (thus,  
10 lower surface area), while maintaining a similar degree of graphitization (Fig. S12(a-c)). The  
11 NiPc/N-mG(900) with a pore size of 18 nm exhibited higher current density than that with a  
12 pore size 24 nm (Fig. S12d). Additionally, it shows slightly higher  $FE_{CO}$  across the entire  
13 potential range. But,  $j_{CO}$  showed greater difference (Fig. S12e,f). The different behavior of  $j_{CO}$   
14 and  $FE_{CO}$  between two sample is attributed to the different surface area caused by the variation  
15 in pore size. Though both catalysts possess pore sizes suitable for effective mass transport,  
16 resulting in negligible differences in ion diffusion kinetics (Fig. S12g), N-mG(900) with 18 nm  
17 mesopores exhibited larger  $C_{dl}$  than that with 24 nm mesopores (Fig. S12h,i), because of larger  
18 surface area participating the catalytic reactions.

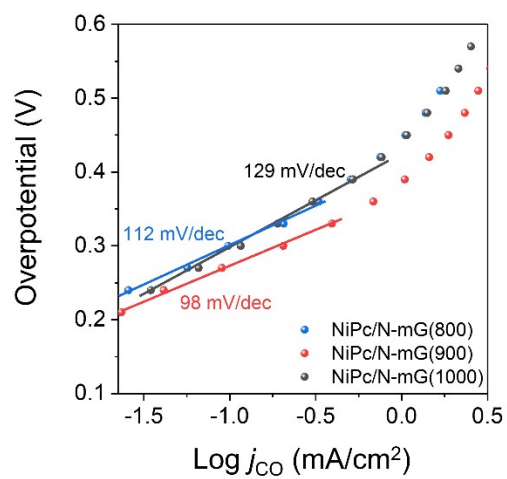

1  
2 **Fig. S13.** Tafel plots of the NiPc/N-mG catalysts.

3  
4

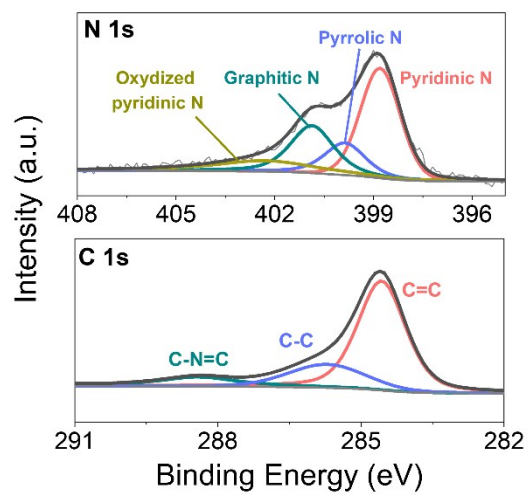

1  
2

3 **Fig. S14.** N 1s and C 1s XPS spectra of NiPc/N-mG(900).

4

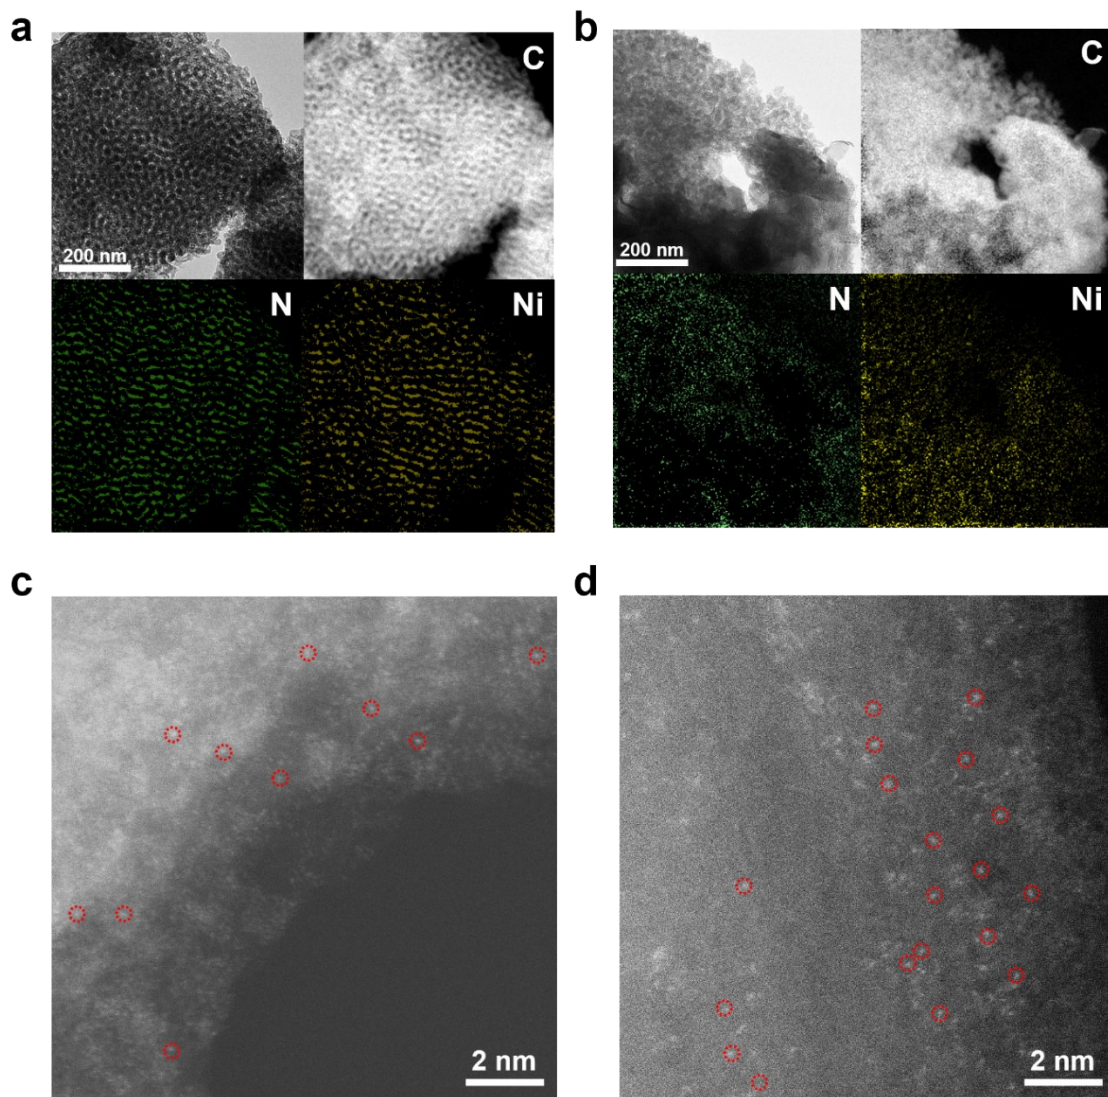

1

2 **Fig. S15.** EELS mappings of (a) NiPc/N-mG(800) and (b) NiPc/N-mG(1000). HAADF-STEM  
 3 images of (c) NiPc/N-mG(800) and (d) NiPc/N-mG(1000). These results confirmed the uniform  
 4 distribution of NiPc on the N-mG supports.

5

6

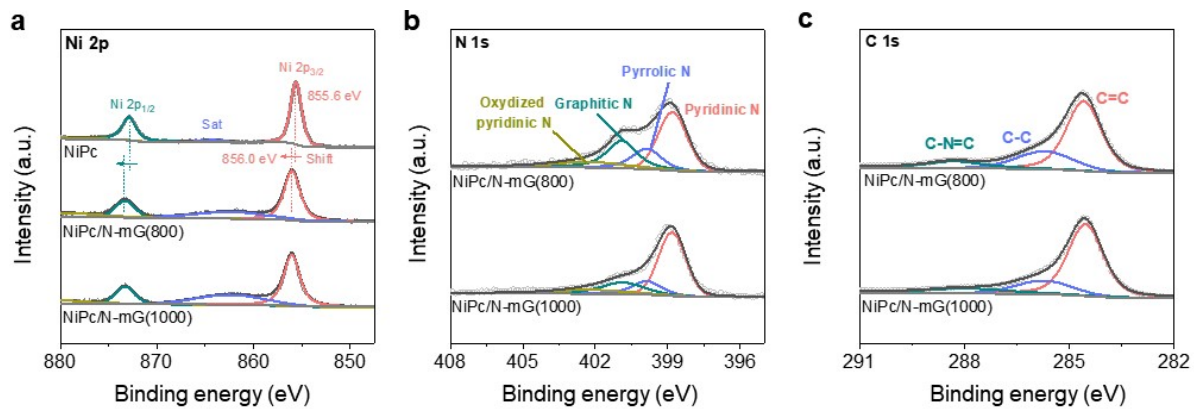

1

2 **Fig. S16.** (a) Ni 2p XPS spectra of NiPc/N-mG(800), NiPc/N-mG(1000), and NiPc. (b) N 1s  
 3 and (c) C 1s XPS spectra of NiPc/N-mG(800) and NiPc/N-mG(1000).

4

5

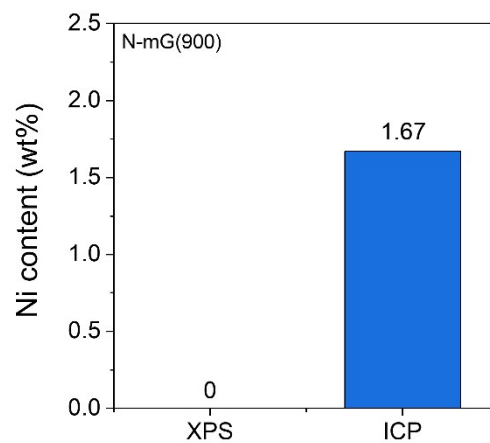

1  
2 **Fig. S17.** Ni content in N-mG(900) determined by XPS and ICP-AES measurements. In the  
3 ICP-AES analysis, nickel content in N-mG(900) was 1.67 wt%, but it was not detected by XPS.  
4 This indicates that the nickel is located within the support framework <sup>9</sup>.  
5

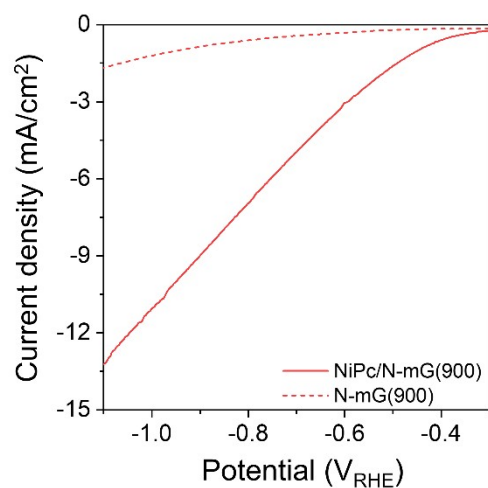

1  
2 **Fig. S18.** LSV curves of N-mG(900) support and NiPc/N-mG(900) catalyst in CO<sub>2</sub>-saturated  
3 0.1 M KHCO<sub>3</sub> electrolyte.

4

5



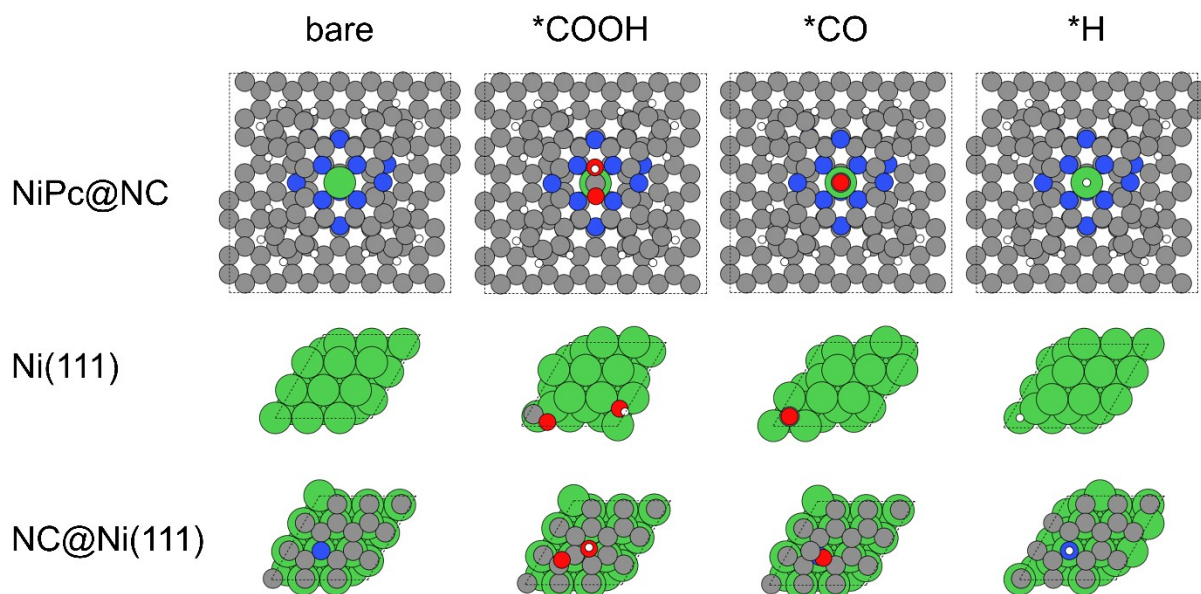

1

2 **Fig. S19.** Atomic structures of the CO<sub>2</sub>RR and HER intermediates of NiPc@NC, Ni(111), and  
 3 NC@Ni(111). The white, gray, red, blue, and green colors represent H, C, O, N, and Ni atoms,  
 4 respectively.

5

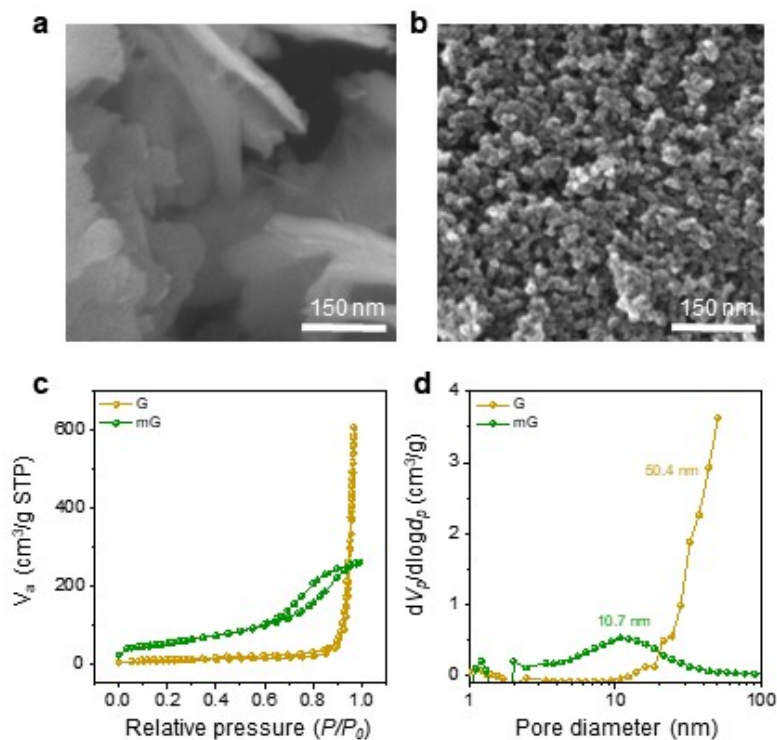

1

2 **Fig. S20.** FE-SEM images of the (a) G and (b) mG supports. (c) Nitrogen adsorption-desorption  
 3 isotherms and (d) pore size distributions of the G and mG supports. The G and mG supports  
 4 exhibit sheet-like morphologies and mesoporous structures, respectively. The G support  
 5 exhibits a type-II isotherm corresponding to a macroporous structure with a predominant pore  
 6 size of 50.4 nm. The mG support exhibits a type-IV isotherm indicating a mesoporous structure  
 7 with a predominant pore size of 10.7 nm. The BET surface area of mG (195.1 m<sup>2</sup> g<sup>-1</sup>) is much  
 8 larger than that of G (31.3 m<sup>2</sup> g<sup>-1</sup>), indicating that mesoporous structures are effective at  
 9 increasing surface area.

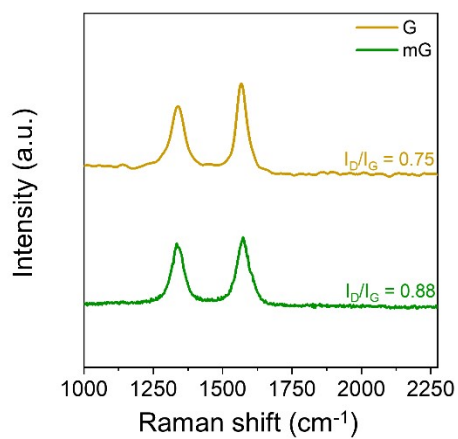

1

2 **Fig. S21.** Raman spectra of the G and mG supports. The  $I_D/I_G$  ratios of the G and mG supports  
3 are 0.75 and 0.88, respectively. These results show that the mG support has a similar degree of  
4 graphitization to that of N-mG(900), whereas the G support has a slightly better graphitization  
5 degree.

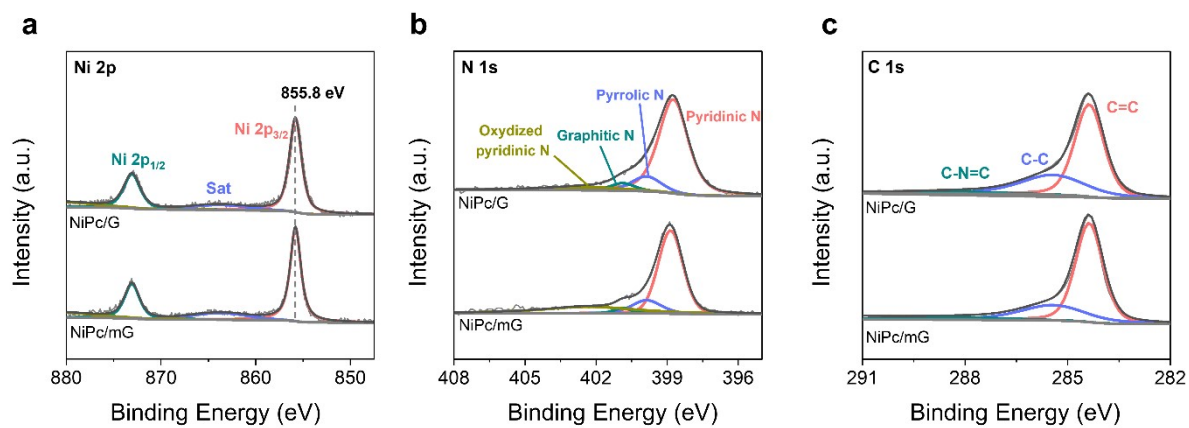

1

2 **Fig. S22.** (a) Ni 2p, (b) N 1s, and (c) C 1s XPS spectra of the NiPc/G and NiPc/mG catalysts.  
 3 NiPc/G and NiPc/mG exhibit similar chemical compositions, while the characteristic Ni 2p<sub>3/2</sub>  
 4 peak of Ni<sup>2+</sup> in NiPc appears at a lower binding energy than that of NiPc/m-G(900) due to the  
 5 absence of nitrogen in the supports.

6

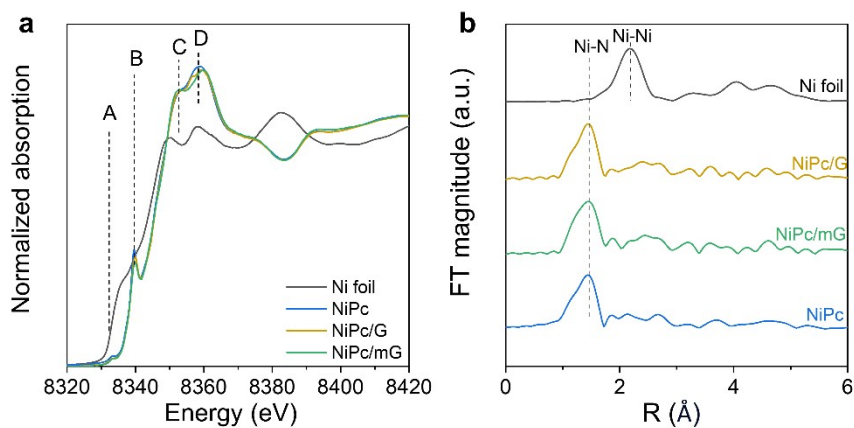

1  
 2 **Fig. S23.** (a) XANES spectra and (b)  $k^3$ -weighted FT-EXAFS spectra of the Ni K-edge of the  
 3 Ni foil, NiPc/G, NiPc/mG, and NiPc. The XANES spectra of NiPc/G and NiPc/mG exhibit  
 4 similar peaks (B–D) to those of NiPc. In addition, the FT-EXAFS spectra of NiPc/G and  
 5 NiPc/mG show only one strong peak at approximately 1.4 Å, corresponding to the Ni–N bond.  
 6 These results confirm the successful decoration of NiPc on the G and mG supports.

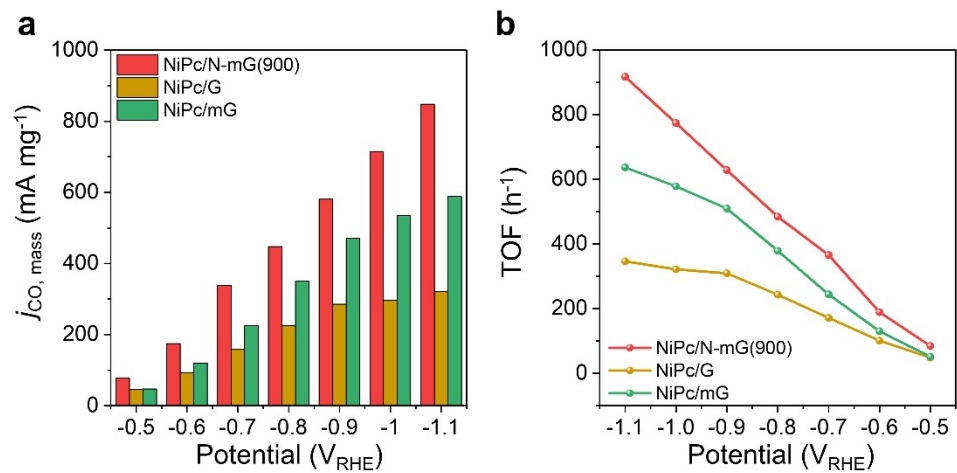

1  
 2 **Fig. S24.** (a) Mass activities, and (b) turnover frequencies of NiPc/N-mG(900), NiPc/G, and  
 3 NiPc/mG catalysts.

4

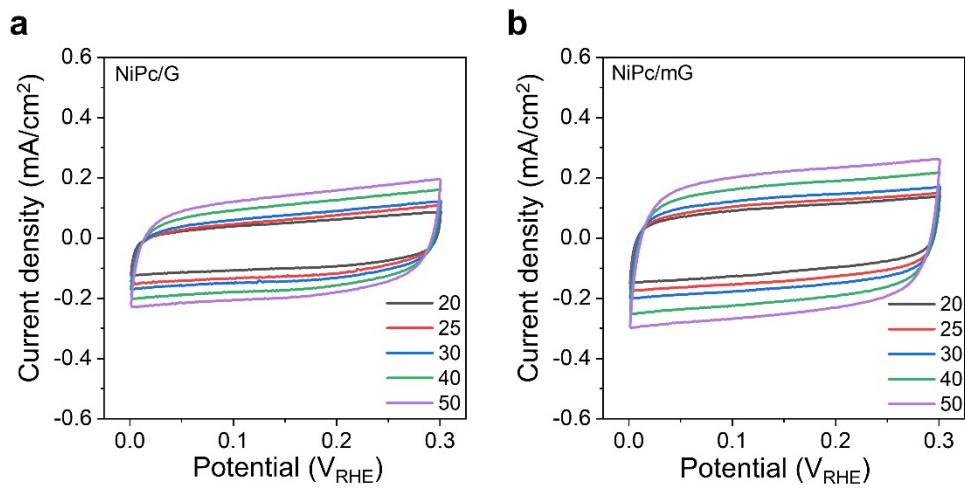

1

2 **Fig. S25.** CV curves of (a) NiPc/G and (b) NiPc/mG at various scan rates (20, 25, 30, 40, and  
3 50 mV s<sup>-1</sup>).

4

1 **Table S1.** Ni atomic composition in the NiPc/N-mG, NiPc/G, and NiPc/mG catalysts  
2 determined via XPS.

| Catalysts           | Ni atomic composition (at %) |
|---------------------|------------------------------|
| NiPc/N-mG(800)      | 0.65                         |
| NiPc/N-mG(900)      | 0.58                         |
| NiPc/N-mG(1000)     | 0.89                         |
| NiPc/N-mG(900)_24nm | 0.51                         |
| NiPc/G              | 0.66                         |
| NiPc/mG             | 0.53                         |

3  
4



1 **Table S2.** Summary of the Ni K-edge EXAFS curve fitting parameters of NiPc/N-mG(900).

| Sample         | Path  | N   | R (Å) | $\sigma^2$ (Å <sup>2</sup> ) | R-factor (%) |
|----------------|-------|-----|-------|------------------------------|--------------|
| NiPc/N-mG(900) | Ni-N  | 4.0 | 1.875 | 0.003                        | 1.75         |
|                | Ni-Ni | 2.7 | 2.480 | 0.009                        |              |

2 (N = coordination number, R = interatomic distance,  $\sigma^2$  = Debye-Waller factor (bond disorder),

3 R-Factor = a measure of the quality of the EXAFS fit.)

4

1 **Table S3.** BET specific surface areas and pore volumes of all the supports.

| Supports       | BET specific surface area (m <sup>2</sup> g <sup>-1</sup> ) | Pore volume (cm <sup>3</sup> g <sup>-1</sup> ) |
|----------------|-------------------------------------------------------------|------------------------------------------------|
| N-mG(800)      | 246.8                                                       | 0.6138                                         |
| N-mG(900)      | 231.4                                                       | 0.4953                                         |
| N-mG(1000)     | 419.5                                                       | 4.4787                                         |
| N-mG(900)_24nm | 207.4                                                       | 0.5908                                         |
| G              | 31.3                                                        | 0.9397                                         |
| mG             | 195.1                                                       | 0.4034                                         |

2  
3

1 **Table S4.** Comparison of catalytic performance for the electroreduction of CO<sub>2</sub> to CO on Ni  
 2 based single atom catalysts.

| Catalysts               | Active site             | Con. Of KHCO <sub>3</sub> (M) | FE <sub>CO</sub> (%) | J <sub>CO</sub> (mA cm <sup>-2</sup> ) | Potential (V <sub>RHE</sub> ) | Partial window over 90% FE <sub>CO</sub> (V <sub>RHE</sub> ) | References       |
|-------------------------|-------------------------|-------------------------------|----------------------|----------------------------------------|-------------------------------|--------------------------------------------------------------|------------------|
| <b>NiPc/N-mG(900)</b>   | <b>Ni-N<sub>4</sub></b> | <b>0.1</b>                    | <b>96.4</b>          | <b>7.8</b>                             | <b>-0.9</b>                   | <b>-0.5 ~ -1.1</b>                                           | <b>This work</b> |
|                         |                         |                               | <b>94.8</b>          | <b>11.3</b>                            | <b>-1.1</b>                   |                                                              |                  |
| NiSA-NGA-900            | Ni-N <sub>4</sub>       | 0.5                           | 90.2                 | 6.4                                    | -0.8                          | -0.8                                                         | 10               |
| Ni/HMCS-3-800           | Ni-N <sub>4</sub>       | 0.5                           | ~95                  | 10.5                                   | -1.0                          | -0.7 ~ -1.1                                                  | 11               |
| Ni-N-ANBC               | -                       | 0.1                           | 97                   | ~2.7                                   | -0.93                         | -0.82 ~ -1.15                                                | 12               |
| Ni SAs-NCW              | Ni-N <sub>4</sub>       | 0.1                           | 92.1                 | 11.4                                   | -0.46                         | -0.46                                                        | 13               |
| Ni <sub>1</sub> -N-C-50 | Ni-N <sub>4</sub>       | 0.5                           | 96                   | ~7                                     | -0.7                          | -0.65 ~ -0.95                                                | 14               |
| Ni-NCN                  | Ni-N <sub>4</sub>       | 0.5                           | 97                   | 9.8                                    | -0.83                         | -0.63 ~ -1.13                                                | 15               |
| Ni <sub>1</sub> -N-C    | Ni-N <sub>4</sub>       | 0.5                           | ~95                  | ~2                                     | -0.7                          | -0.60 ~ -0.95                                                | 16               |
| Ni-N-CNTs-10            | Ni-N <sub>4</sub>       | 0.5                           | 98.3                 | 5.3                                    | -0.65                         | -0.60 ~ -0.75                                                | 17               |
| Ni SAC                  | Ni-N <sub>4</sub>       | 0.5                           | 85                   | 12                                     | -0.8                          | -                                                            | 18               |

3

## 1 References

- 2 1. G. Kresse and J. Furthmüller, *Phys. Rev. B*, 1996, **54**, 11169.
- 3 2. G. Kresse and J. Hafner, *Phys. Rev. B*, 1993, **47**, 558.
- 4 3. B. Hammer, L. B. Hansen and J. K. Nørskov, *Phys. Rev. B*, 1999, **59**, 7413.
- 5 4. H. J. Monkhorst and J. D. Pack, *Phys. Rev. B*, 1976, **13**, 5188.
- 6 5. J. K. Nørskov, J. Rossmeisl, A. Logadottir, L. Lindqvist, J. R. Kitchin, T. Bligaard and H.  
7 Jonsson, *J. Phys. Chem. B*, 2004, **108**, 17886-17892.
- 8 6. J. Rossmeisl, Z.-W. Qu, H. Zhu, G.-J. Kroes and J. K. Nørskov, *J. Electroanal. Chem.*,  
9 2007, **607**, 83-89.
- 10 7. K. Mathew, V. Kolluru, S. Mula, S. N. Steinmann and R. G. Hennig, *J. Chem. Phys.*,  
11 2019, **151**.
- 12 8. K. Mathew, R. Sundararaman, K. Letchworth-Weaver, T. Arias and R. G. Hennig, *J.*  
13 *Chem. Phys.*, 2014, **140**.
- 14 9. S. Liang, Q. Jiang, Q. Wang and Y. Liu, *Adv. Energy Mater.*, 2021, **11**, 2101477.
- 15 10. K. Mou, Z. Chen, X. Zhang, M. Jiao, X. Zhang, X. Ge, W. Zhang and L. Liu, *Small*,  
16 2019, **15**, 1903668.
- 17 11. W. Xiong, H. Li, H. Wang, J. Yi, H. You, S. Zhang, Y. Hou, M. Cao, T. Zhang and R.  
18 Cao, *Small*, 2020, **16**, 2003943.
- 19 12. S. Fu, B. Izelaar, M. Li, Q. An, M. Li, W. de Jong and R. Kortlever, *Nano Energy*, 2024,  
20 110461.
- 21 13. H. Chang, H. Pan, F. Wang, Z. Zhang, Y. Kang and S. Min, *Nanoscale*, 2022, **14**, 10003-  
22 10008.
- 23 14. M. Wen, N. Sun, L. Jiao, S. Q. Zang and H. L. Jiang, *Angew. Chem.*, 2024, **136**,  
24 e202318338.
- 25 15. C. Lv, K. Huang, Y. Fan, J. Xu, C. Lian, H. Jiang, Y. Zhang, C. Ma, W. Qiao and J.  
26 Wang, *Nano Energy*, 2023, **111**, 108384.

- 1 16. L. Jiao, J. Zhu, Y. Zhang, W. Yang, S. Zhou, A. Li, C. Xie, X. Zheng, W. Zhou and S.-H.  
2 Yu, *J. Am. Chem. Soc.*, 2021, **143**, 19417-19424.
- 3 17. S. Wu, F. Yi, D. Ping, S. Huang, Y. Zhang, L. Han, S. Wang, H. Wang, X. Yang and D.  
4 Guo, *Carbon*, 2022, **196**, 1-9.
- 5 18. Q. Pan, Y. Chen, H. Li, G. Ma, S. Jiang, X. Cui, L. Zhang, Y. Bao and T. Ma, *J. Mater.*  
6 *Chem. A*, 2024, **12**, 20035-20044.
